# Supplementary material for: Trifluoromethylated Flavonoid-Based Isoxazoles as Antidiabetic and Anti-Obesity Agents: Synthesis, In Vitro α-Amylase Inhibitory Activity, Molecular Docking and Structure–Activity Relationship Analysis
Source: MDPI journal article supplement (doi:10.3390/molecules26175214), 2021-08-27
Supplement: s1 [file s1]

Article

# Trifluoromethylated Flavonoid-Based Isoxazoles as Antidiabetic and Anti-Obesity Agents: Synthesis, *In Vitro* $\alpha$ -Amylase Inhibitory Activity, Molecular Docking, and Structure–Activity Relationship Analysis

Faisal K. Algethami <sup>1,\*</sup>, Ilyes Saidi <sup>2</sup>, Hani Nasser Abdelhamid <sup>3</sup>, Mohamed R. Elamin <sup>1</sup>, Babiker Y. Abdulkhair <sup>1</sup>, Amani Chrouda <sup>4</sup> and Hichem Ben Jannet <sup>2,\*</sup>

<sup>1</sup> Department of Chemistry, College of Science, Imam Mohammad Ibn Saud Islamic University (IMSIU), Riyadh 11432, Saudi Arabia; mohamedrahmt99@gmail.com (M.R.E.); babiker35.by@gmail.com (B.Y.A.)

<sup>2</sup> Laboratory of Heterocyclic Chemistry, Natural Products and Reactivity (LR11ES39), Medicinal Chemistry and Natural Products Team, Faculty of Science of Monastir, University of Monastir, Avenue of Environment, Monastir 5019, Tunisia; sisoelyesaidi@live.fr

<sup>3</sup> Department of Chemistry, Advanced Multifunctional Materials Laboratory, Faculty of Science, Assiut University, Assiut 71575, Egypt; chemist.hani@yahoo.com

<sup>4</sup> Department of Chemistry, College of Science Al-zulfi, Majmaah University, Al-Majmaah 11952, Saudi Arabia; amain.c@mu.edu.sa

\* Correspondence: falgethami@imamu.edu.sa (F.K.A.); hichem.bjannet@gmail.com (H.B.J.)

**Figure S1:** NMR spectra of the synthesized compounds (1, 2 and 3a-m).

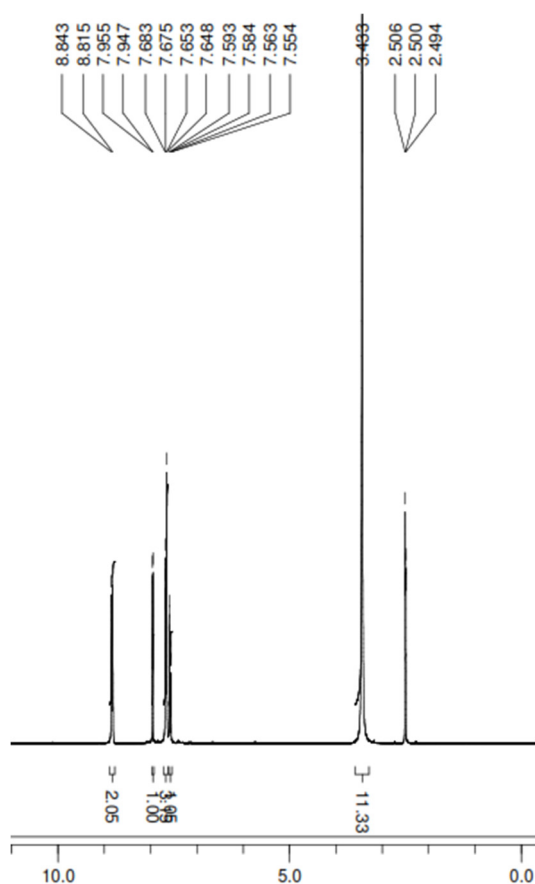

<sup>1</sup>H NMR Spectrum (300 MHz, DMSO-*d*<sub>6</sub>) of 1.

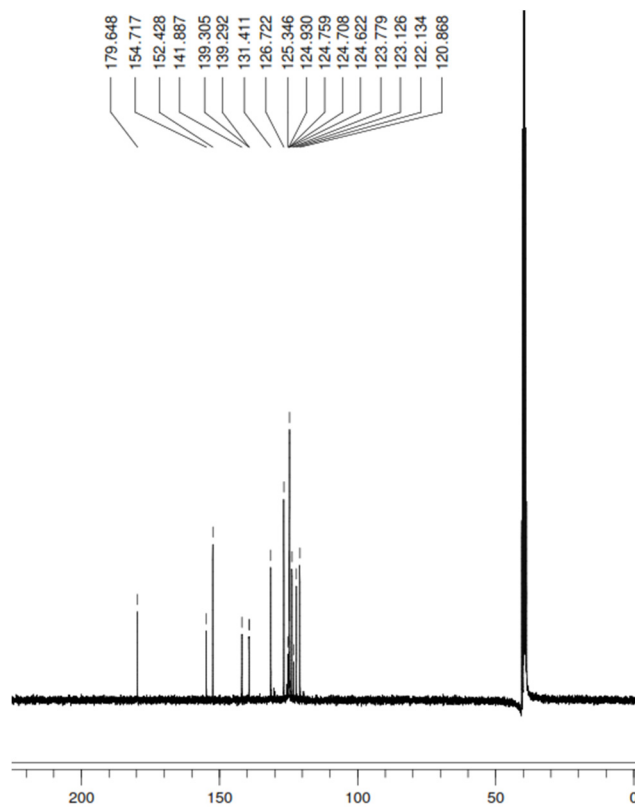

$^{13}\text{C}$  NMR Spectrum (75 MHz,  $\text{DMSO}-d_6$ ) of 1.

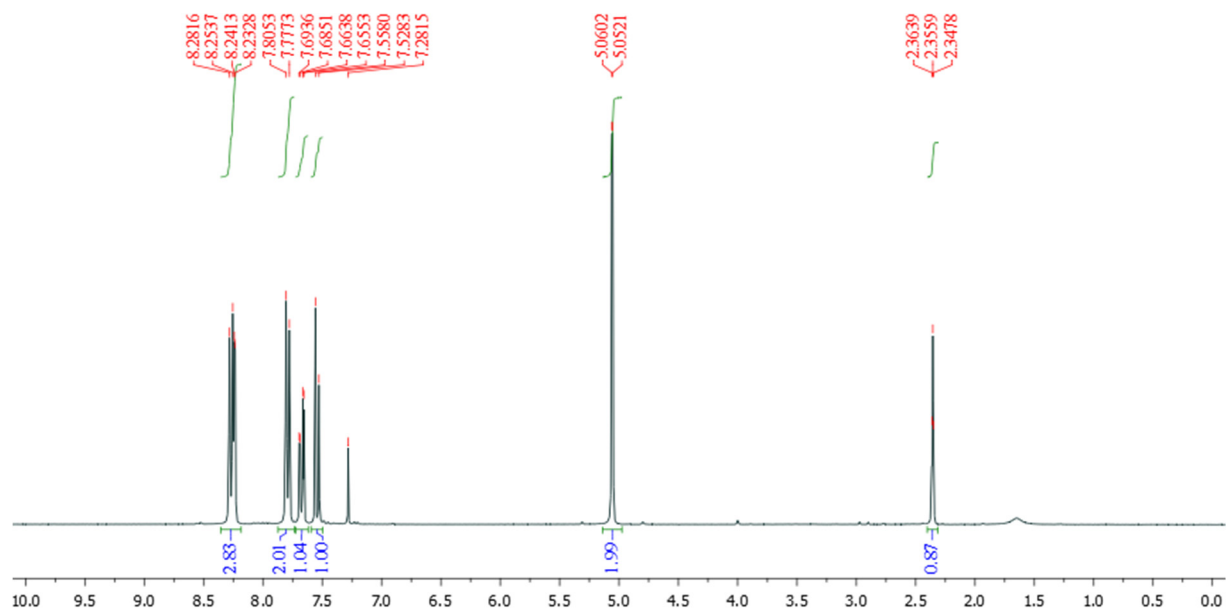

$^1\text{H}$  NMR Spectrum (300 MHz,  $\text{CDCl}_3$ ) of 2.

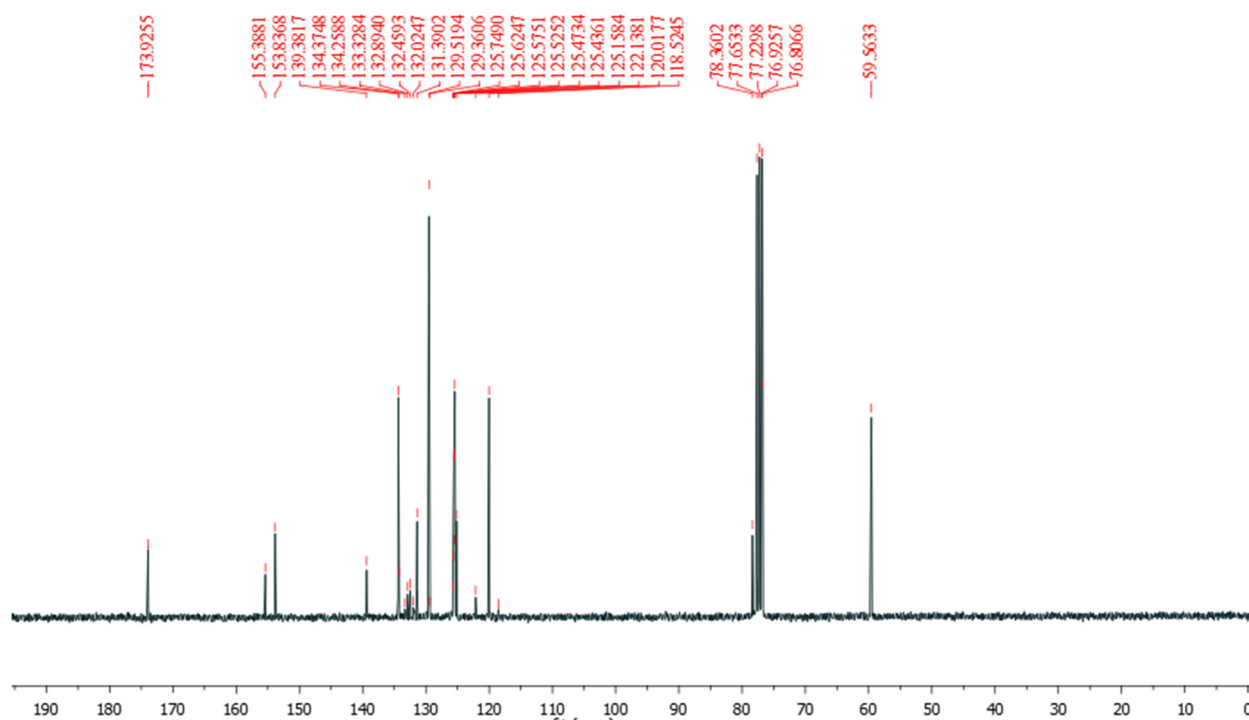

<sup>13</sup>C NMR Spectrum (75 MHz, CDCl<sub>3</sub>) of 2.

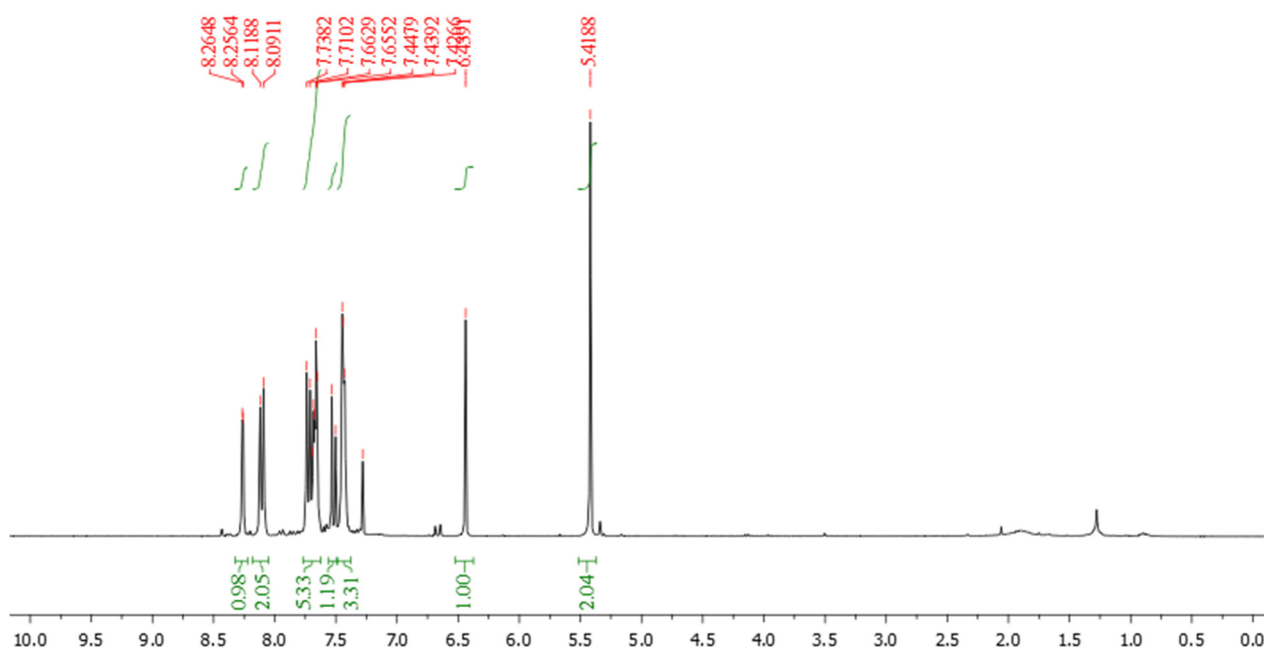

<sup>1</sup>H NMR Spectrum (300 MHz, CDCl<sub>3</sub>) of 3a.

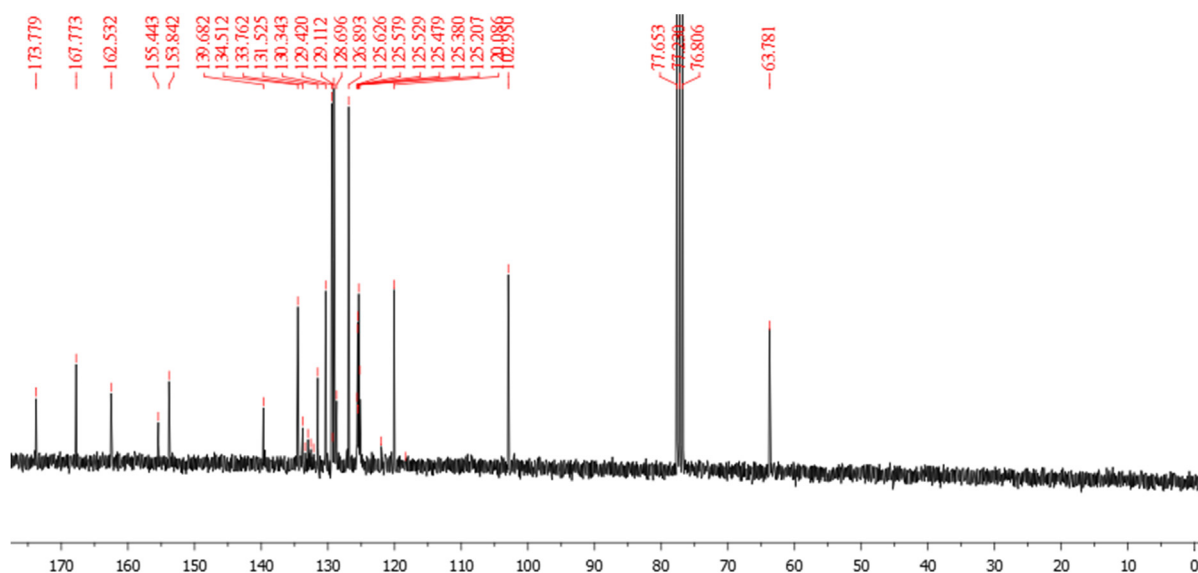 $^{13}\text{C}$  NMR Spectrum (75 MHz,  $\text{CDCl}_3$ ) of 3a.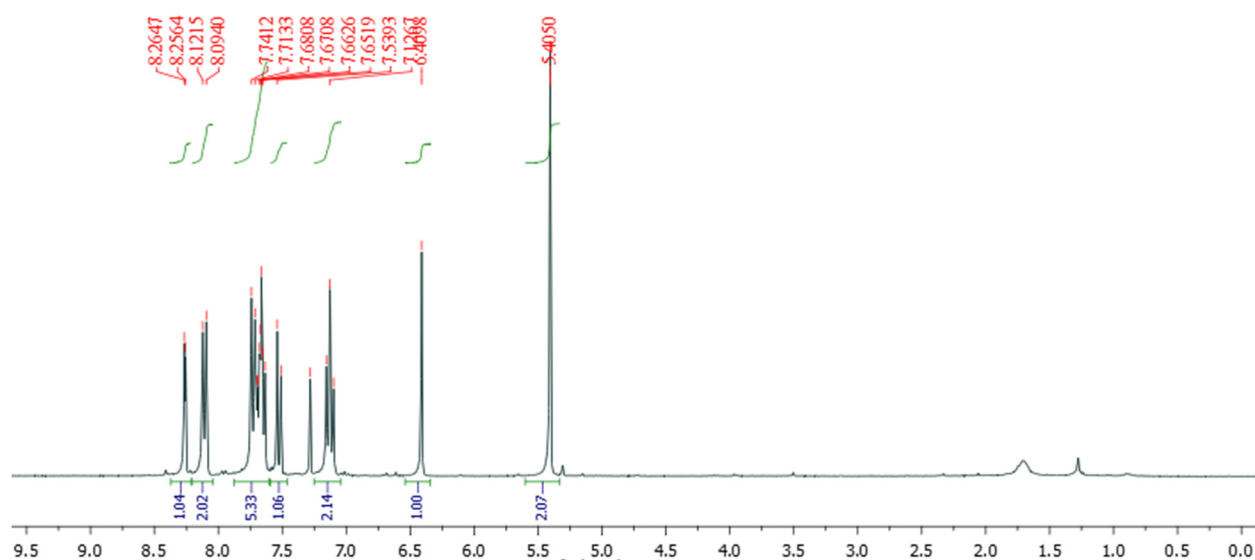 $^1\text{H}$  NMR Spectrum (300 MHz,  $\text{CDCl}_3$ ) of 3b.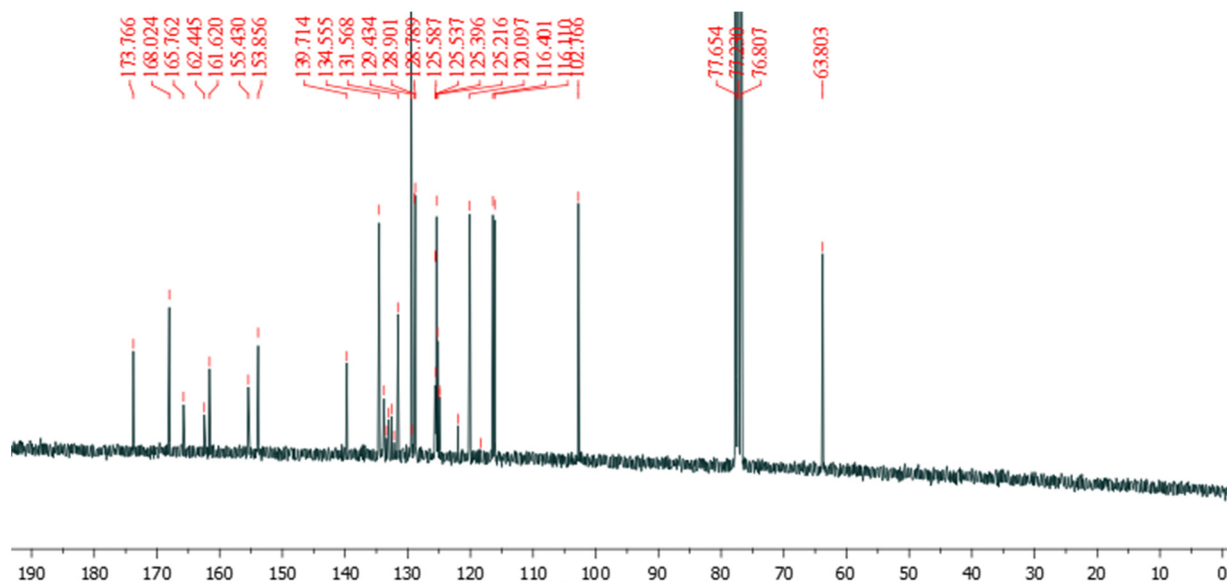

<sup>13</sup>C NMR Spectrum (75 MHz, CDCl<sub>3</sub>) of 3b.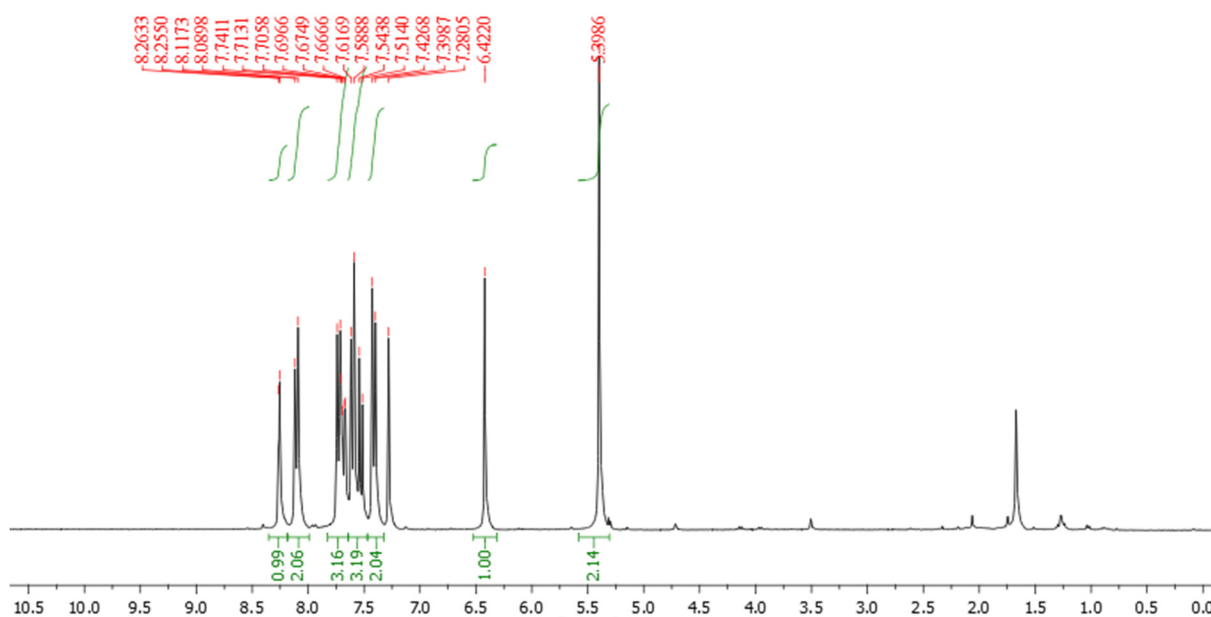<sup>1</sup>H NMR Spectrum (300 MHz, CDCl<sub>3</sub>) of 3c.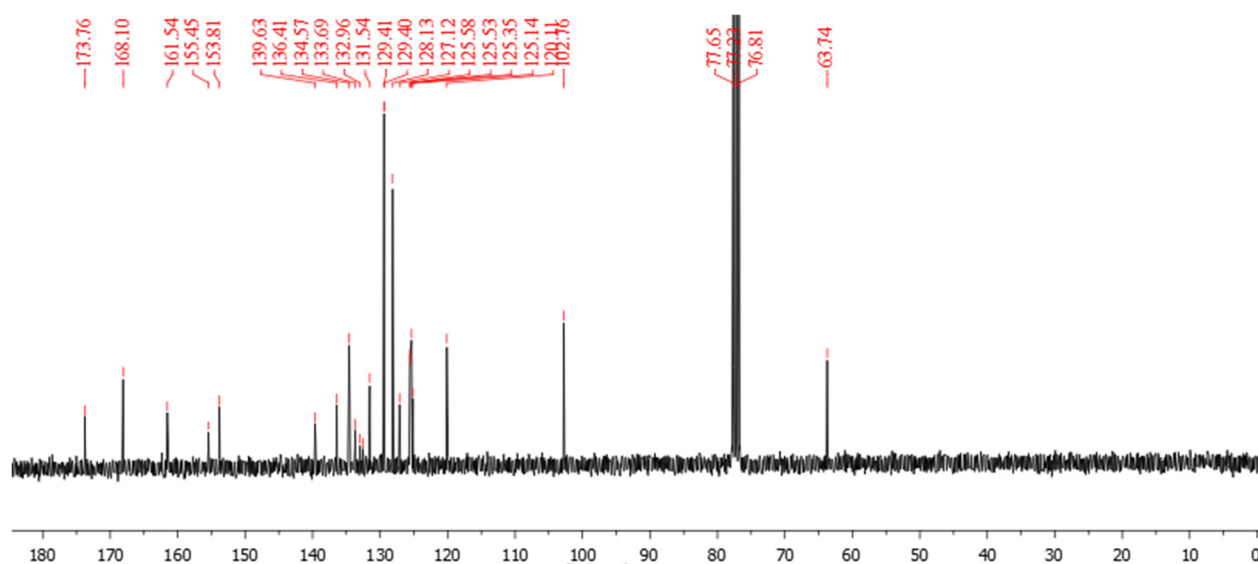<sup>13</sup>C NMR Spectrum (75 MHz, CDCl<sub>3</sub>) of 3c.

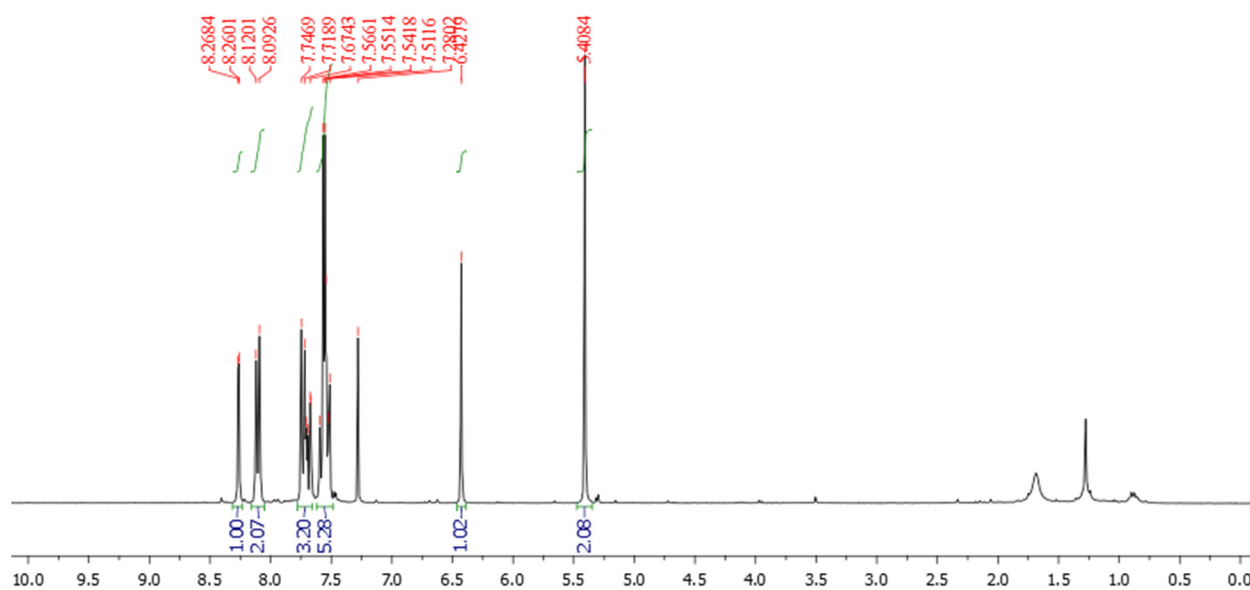<sup>1</sup>H NMR Spectrum (300 MHz, CDCl<sub>3</sub>) of 3d.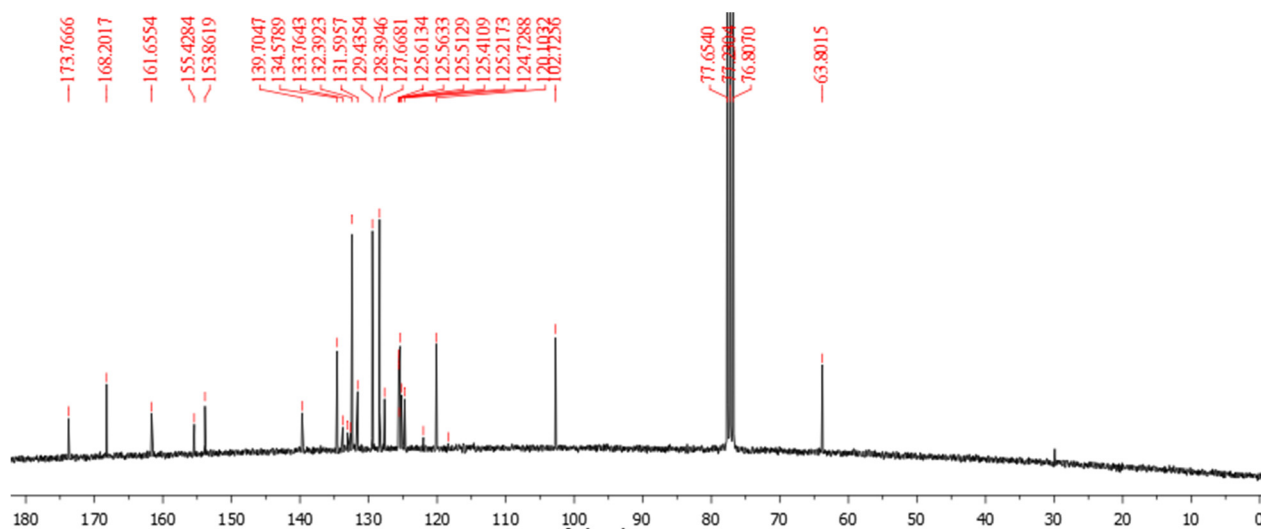<sup>13</sup>C NMR Spectrum (75 MHz, CDCl<sub>3</sub>) of 3d.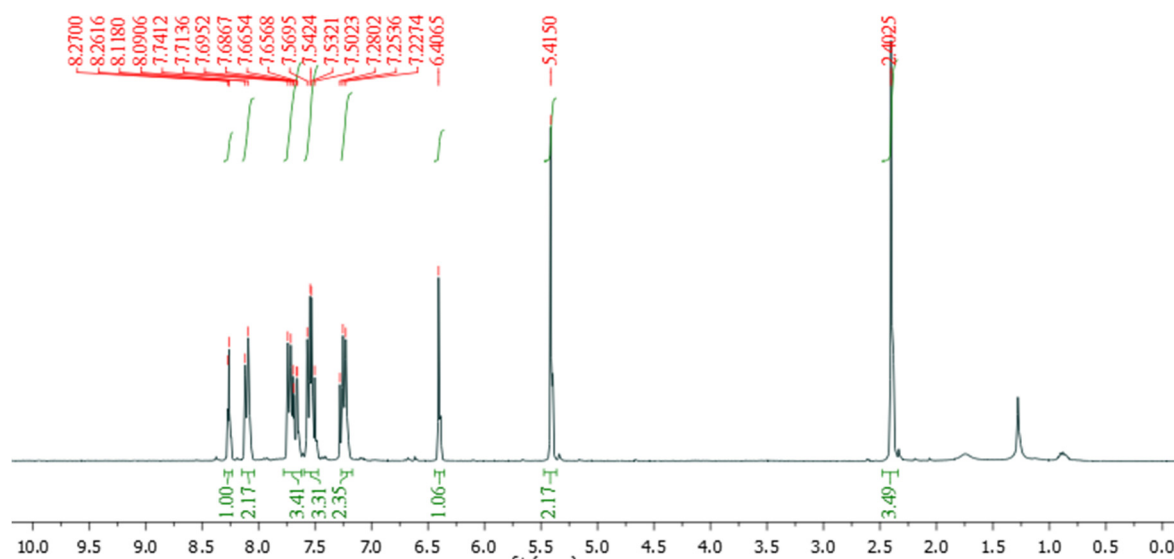<sup>1</sup>H NMR Spectrum (300 MHz, CDCl<sub>3</sub>) of 3e.

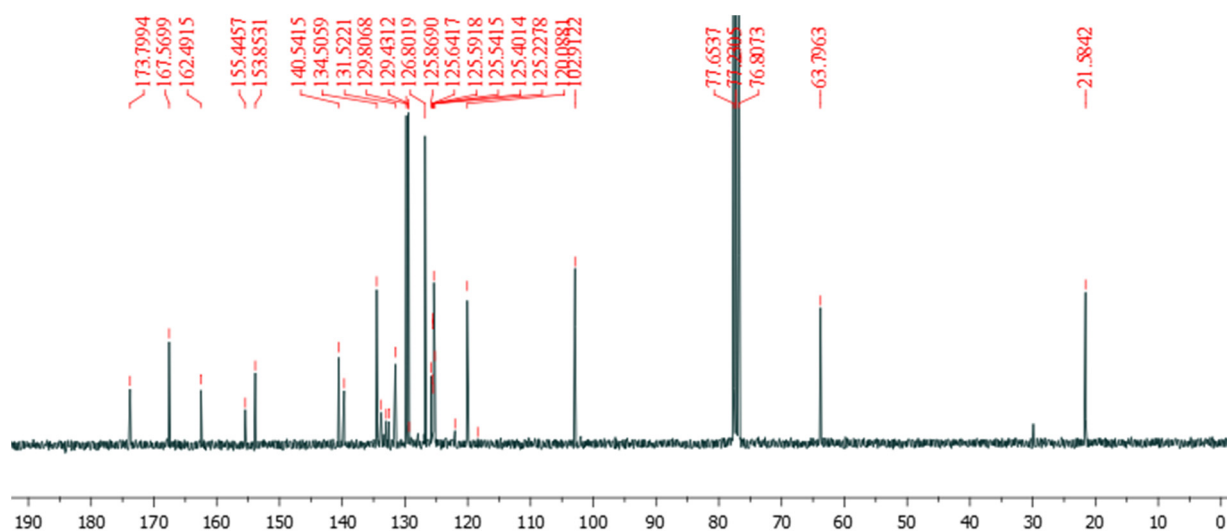<sup>13</sup>C NMR Spectrum (75 MHz, CDCl<sub>3</sub>) of 3e.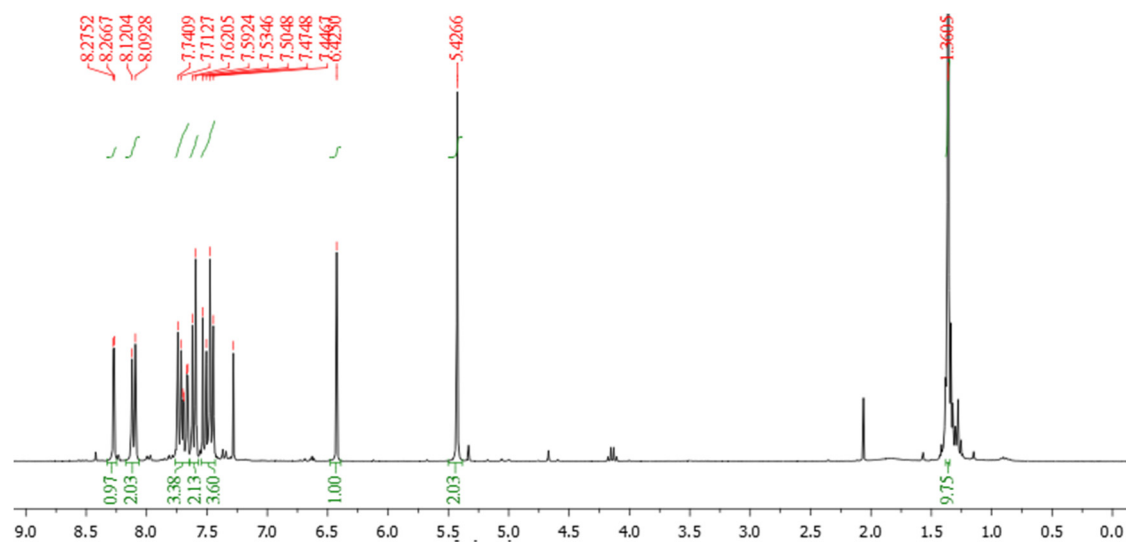<sup>1</sup>H NMR Spectrum (300 MHz, CDCl<sub>3</sub>) of 3f.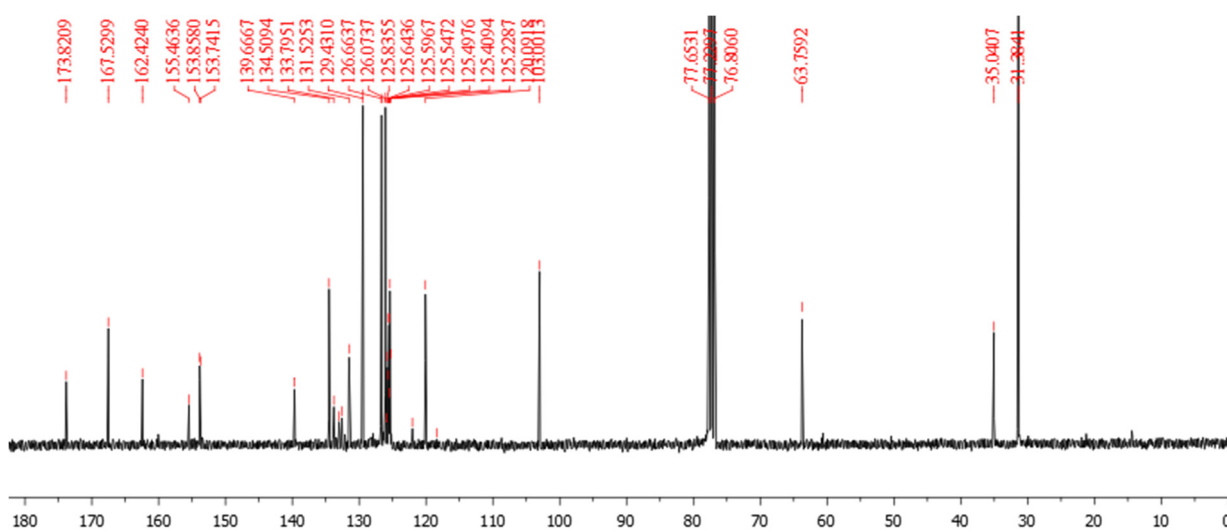<sup>13</sup>C NMR Spectrum (75 MHz, CDCl<sub>3</sub>) of 3f.

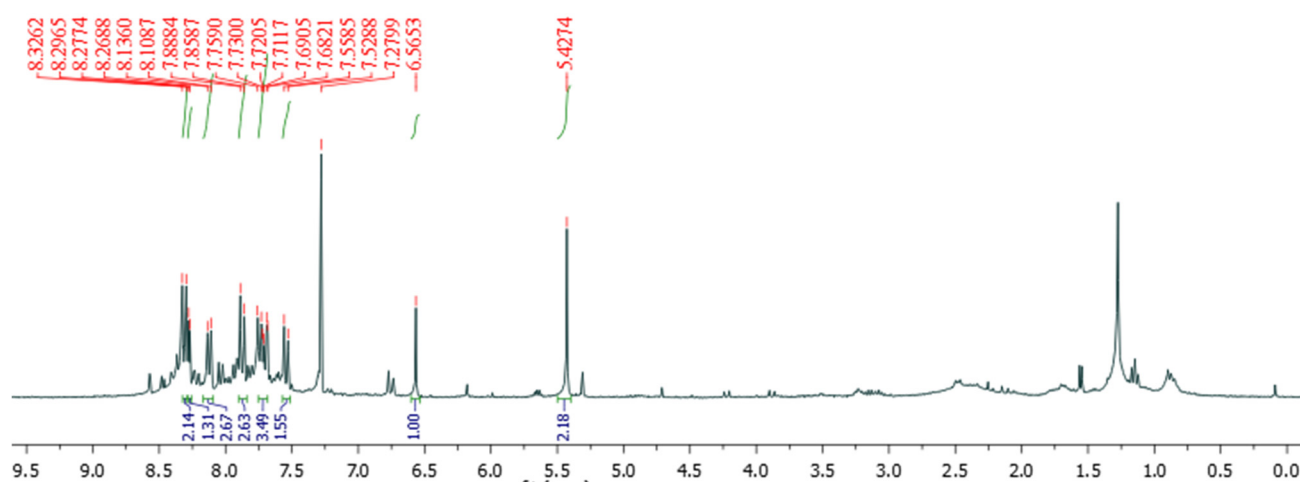

<sup>1</sup>H NMR Spectrum (300 MHz, CDCl<sub>3</sub>) of 3g.

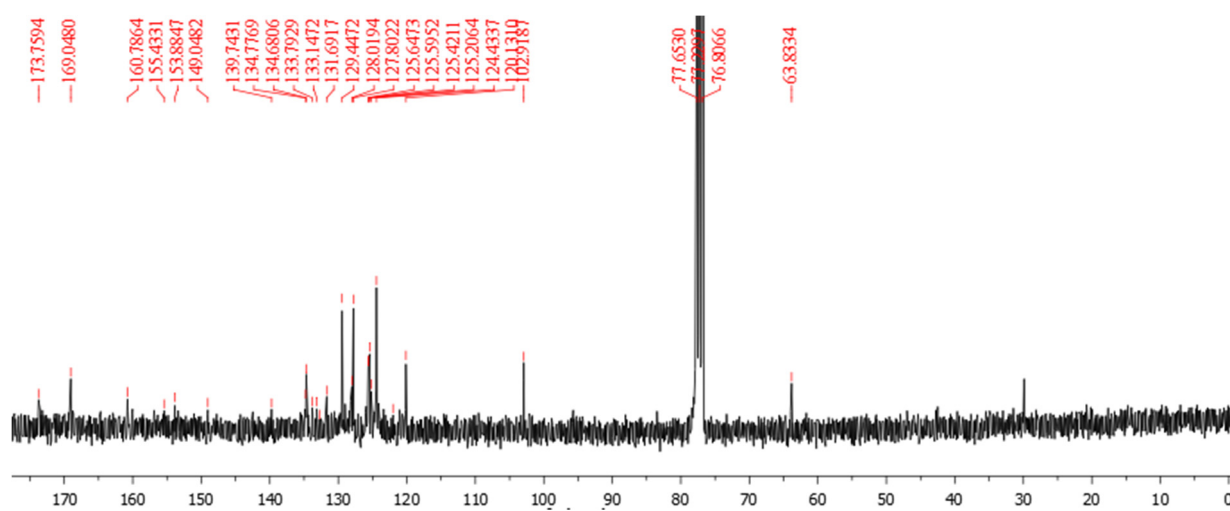

<sup>13</sup>C NMR Spectrum (75 MHz, CDCl<sub>3</sub>) of 3g.

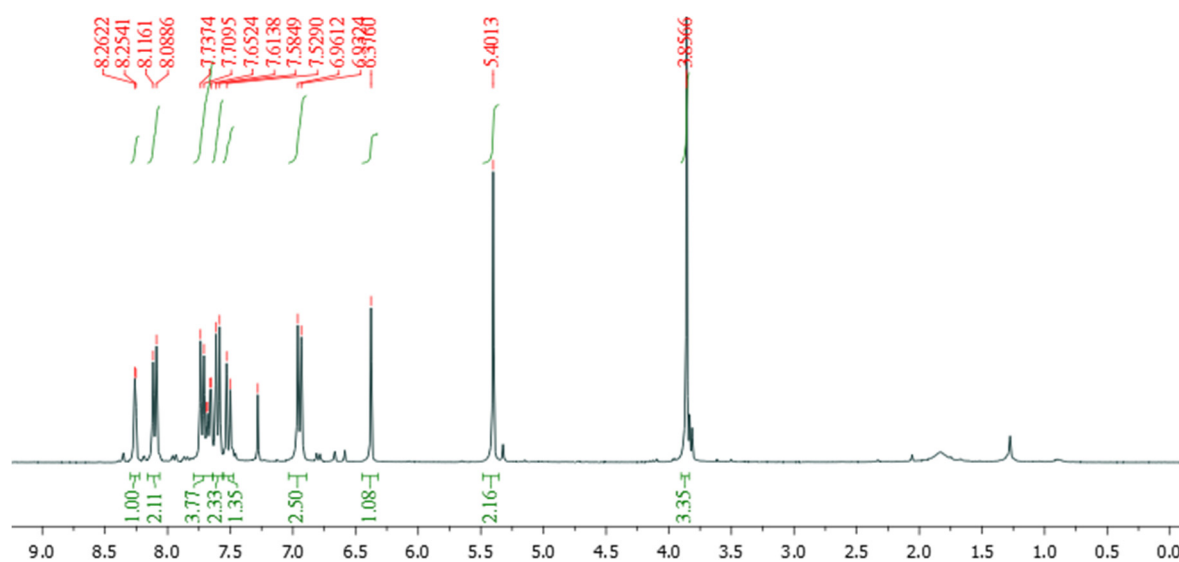

<sup>1</sup>H NMR Spectrum (300 MHz, CDCl<sub>3</sub>) of 3h.



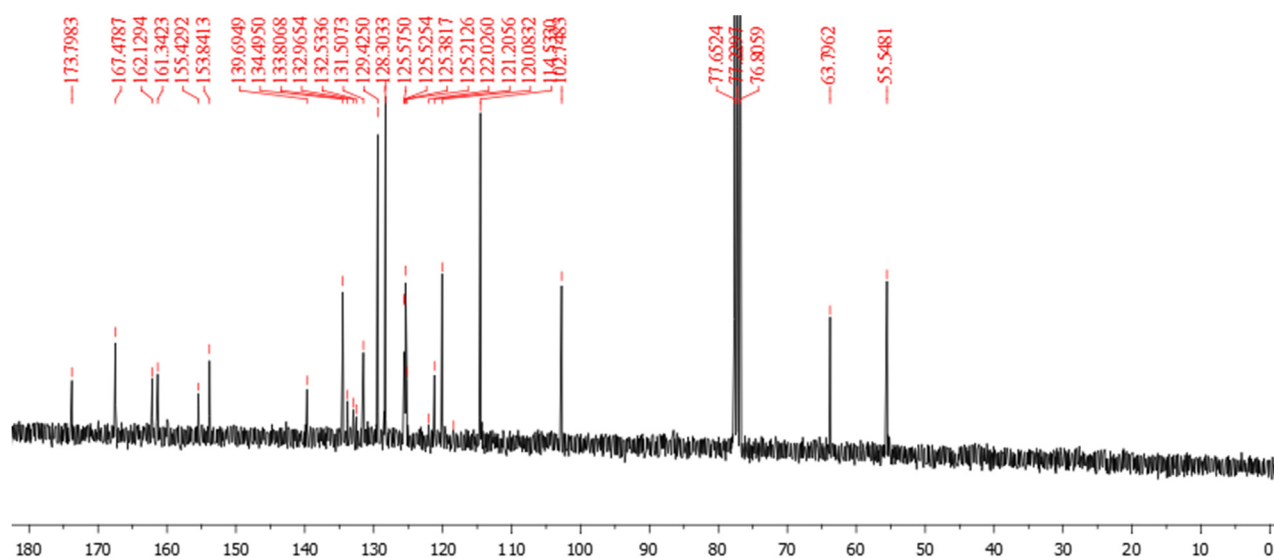

<sup>13</sup>C NMR Spectrum (75 MHz, CDCl<sub>3</sub>) of 3h.

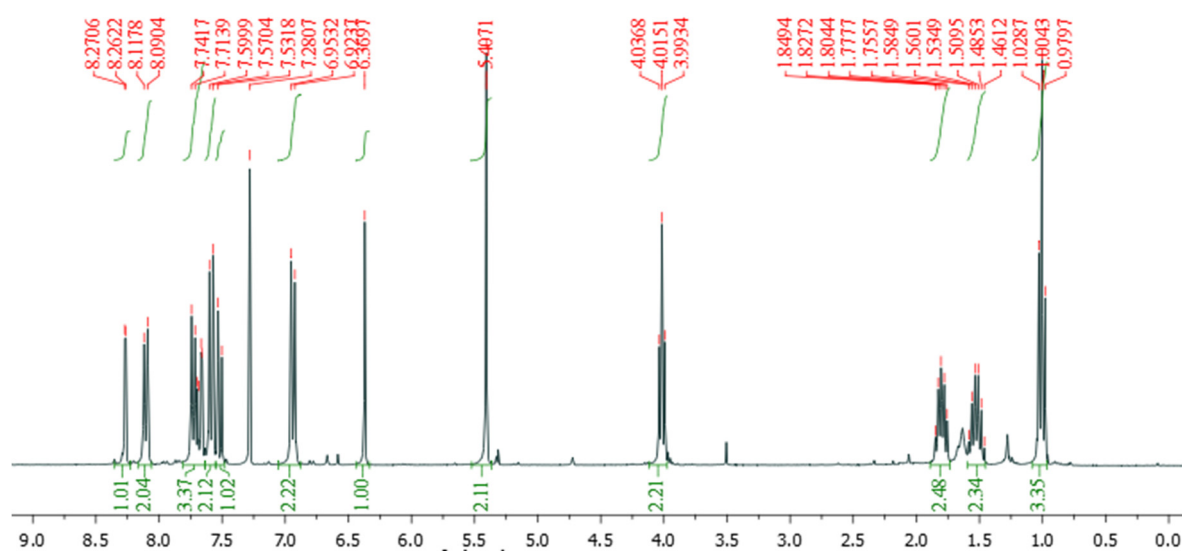

<sup>1</sup>H NMR Spectrum (300 MHz, CDCl<sub>3</sub>) of 3i.

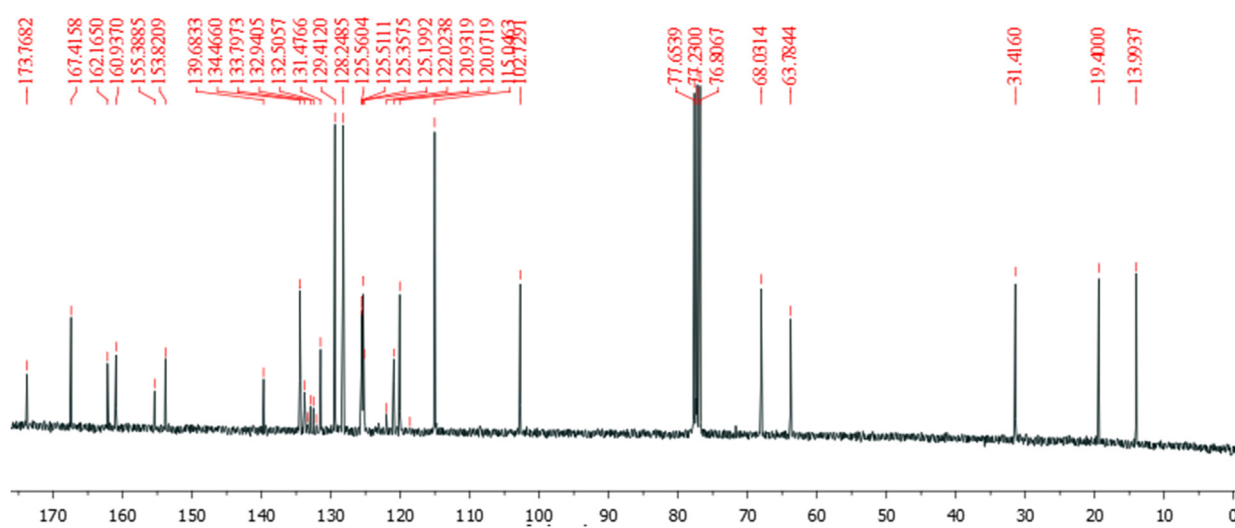

<sup>13</sup>C NMR Spectrum (75 MHz, CDCl<sub>3</sub>) of 3i.

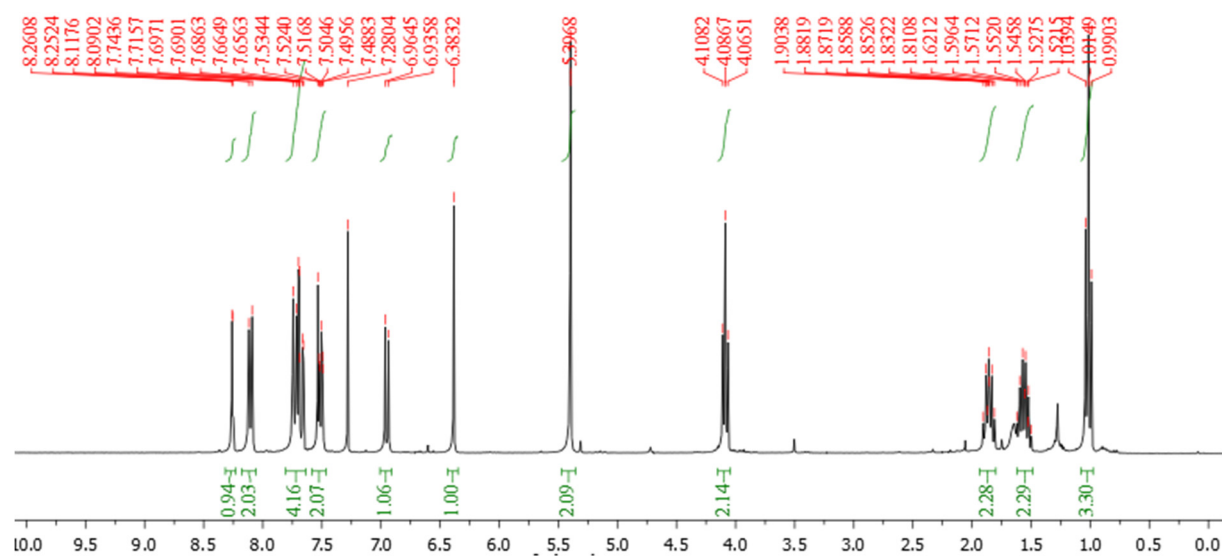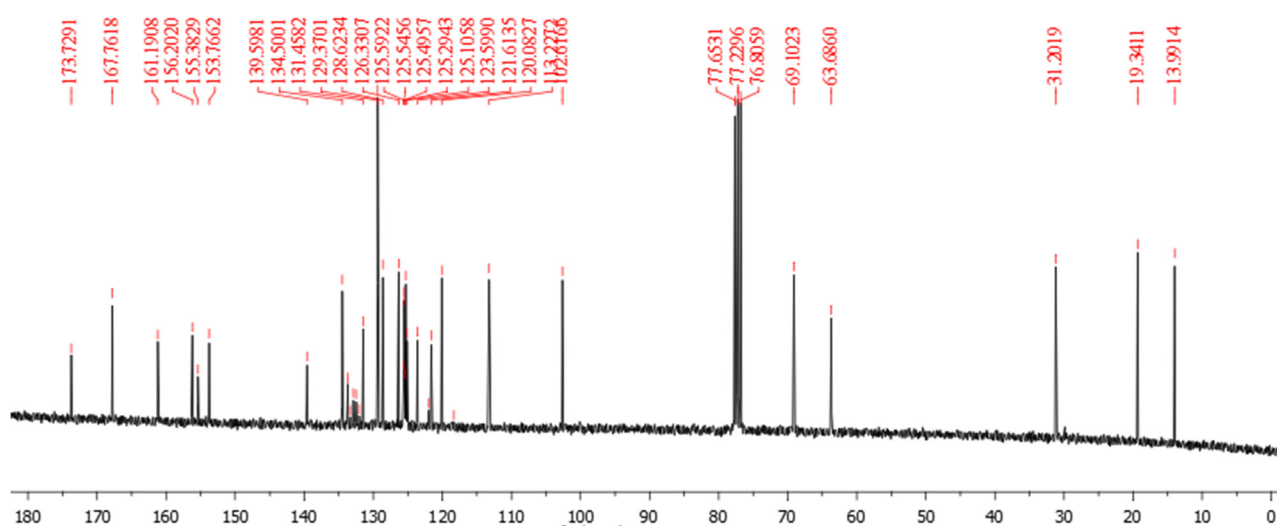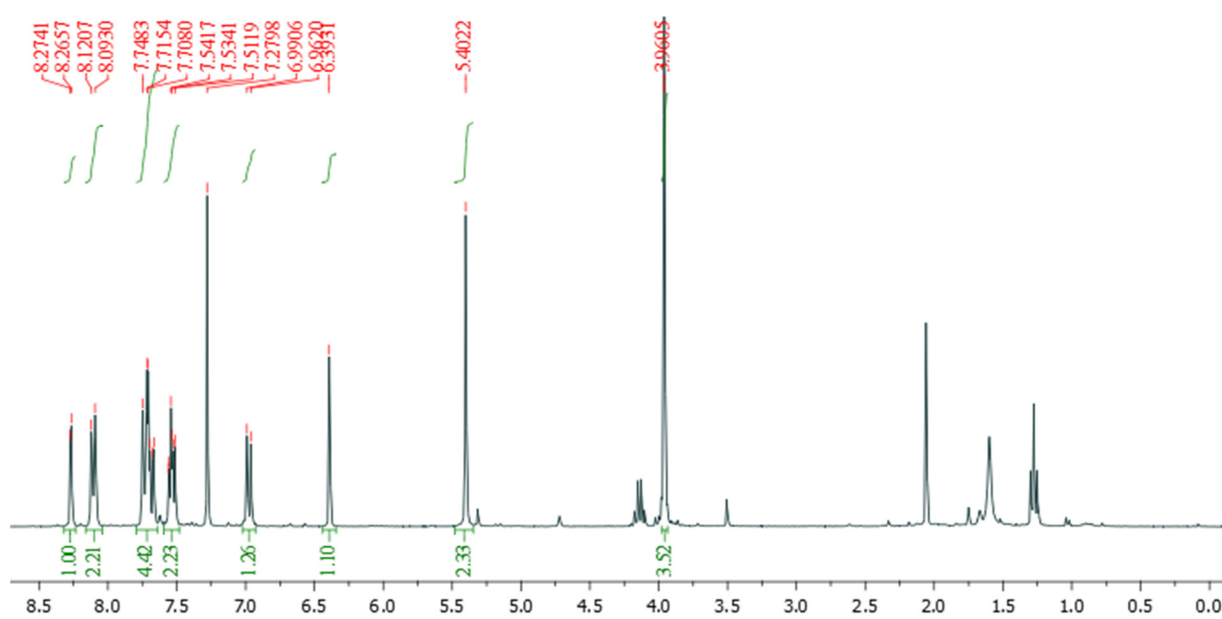

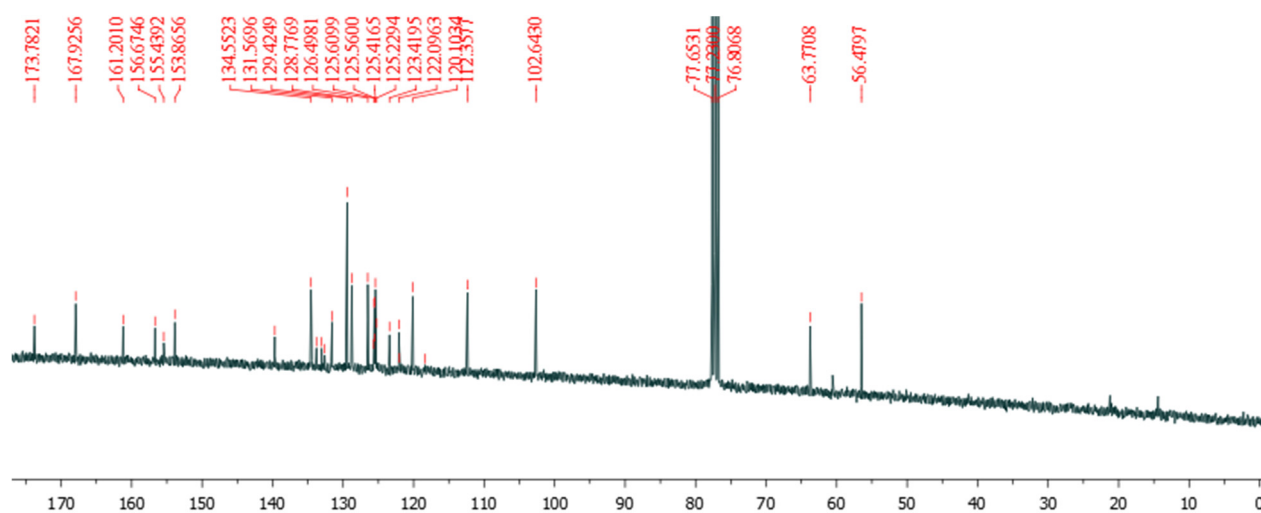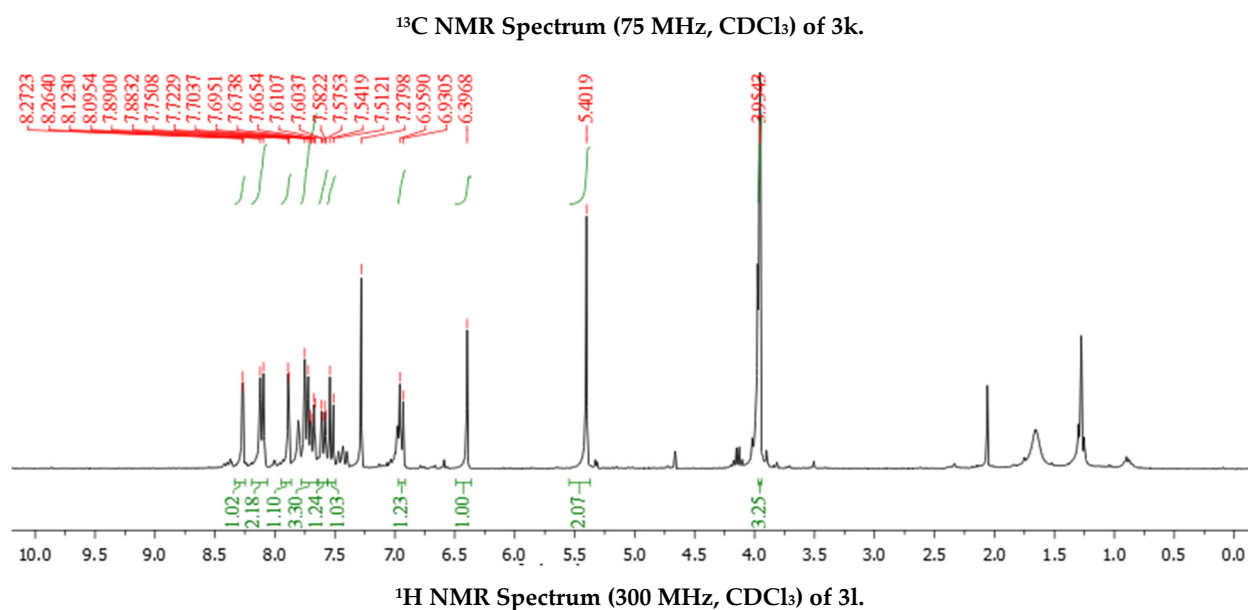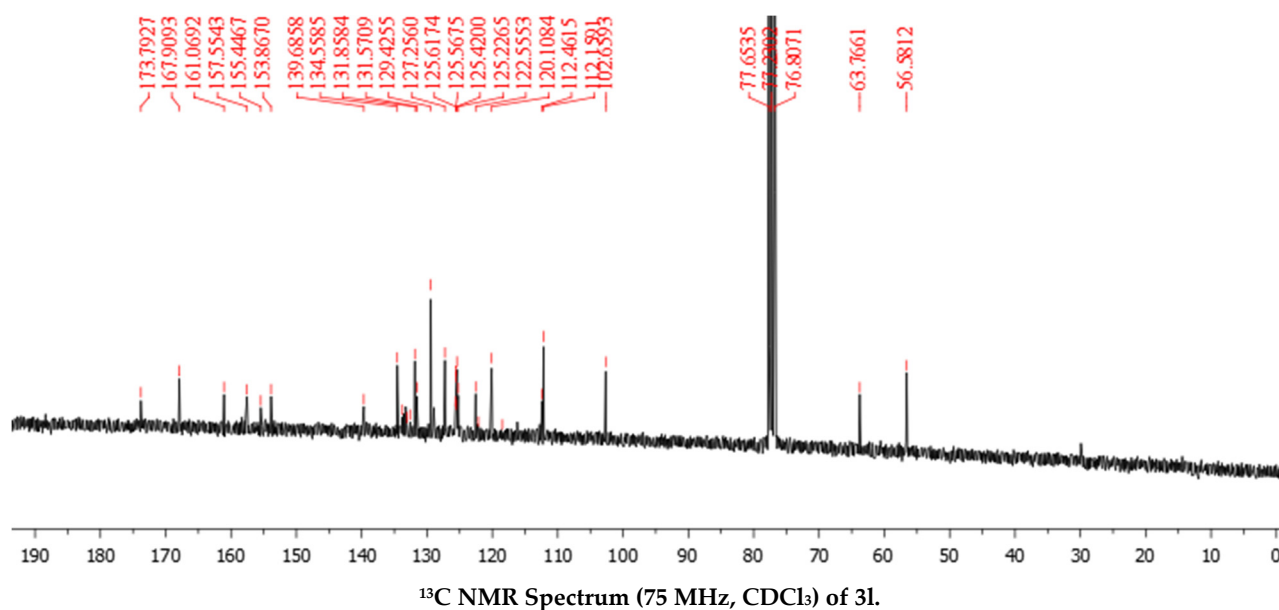

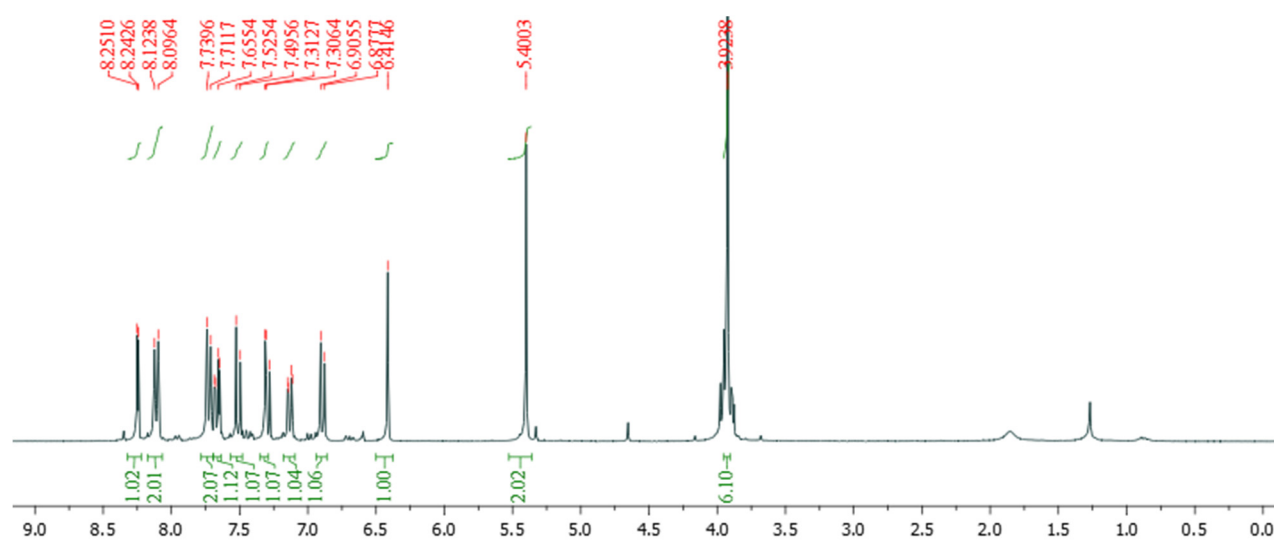<sup>1</sup>H NMR Spectrum (300 MHz, CDCl<sub>3</sub>) of 3m.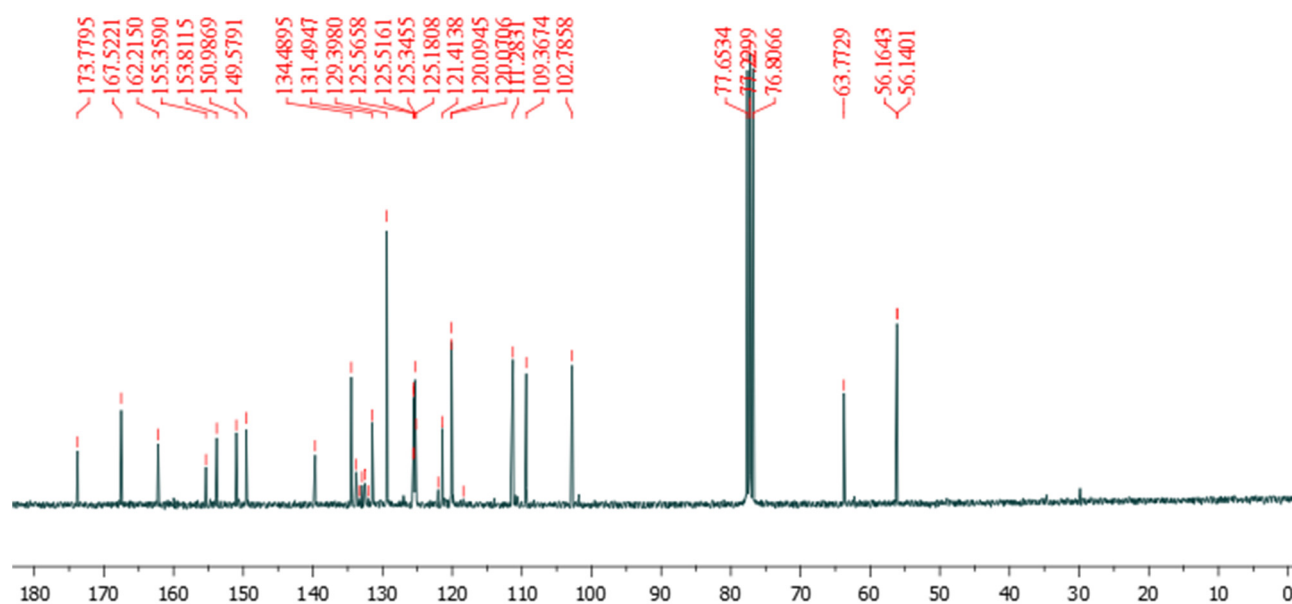<sup>13</sup>C NMR Spectrum (75 MHz, CDCl<sub>3</sub>) of 3m.Table S1. The concentration-response curves used to calculate the IC<sub>50</sub> values.

| Compound | Curves | log(IC <sub>50</sub> ) |
|----------|--------|------------------------|
| 1        |        | 1.1859949              |

**2**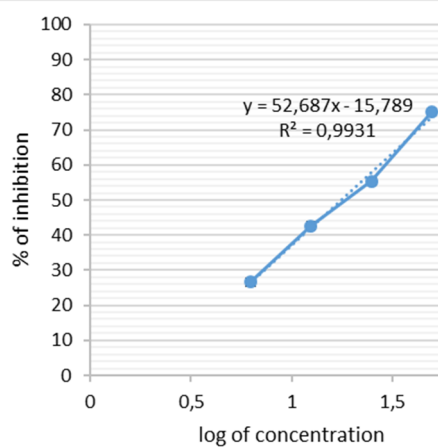

1.24867614

**3a**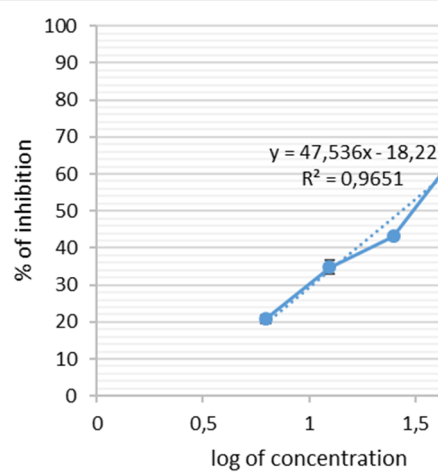

1.43512285

**3b**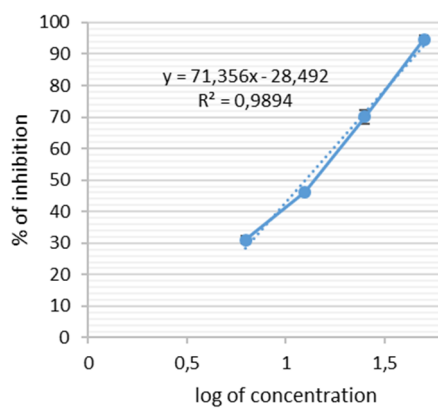

1.10000561

**3c**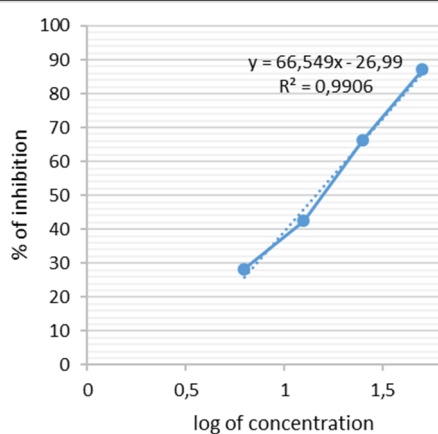

1.15689191

**3d**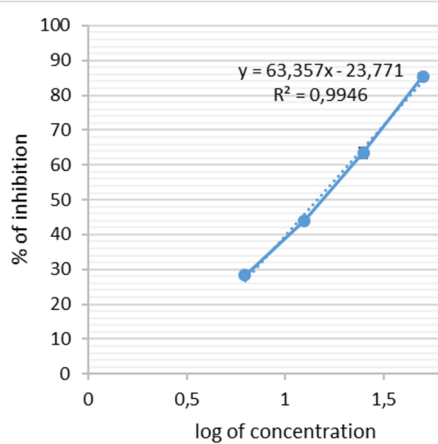

1.16437016

**3e**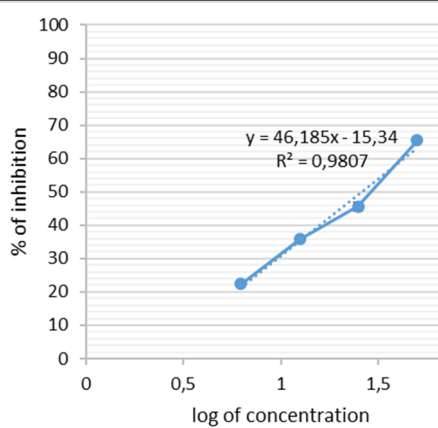

1.41474505

**3f**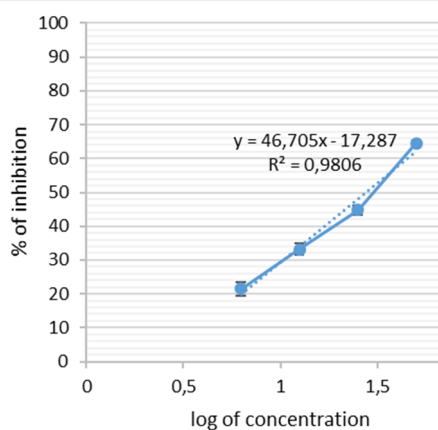

1.440680869

**3g**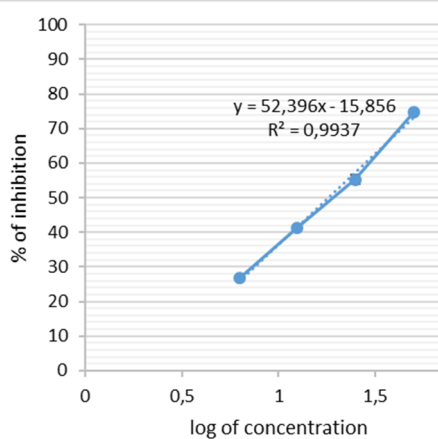

1.25688984

**3h**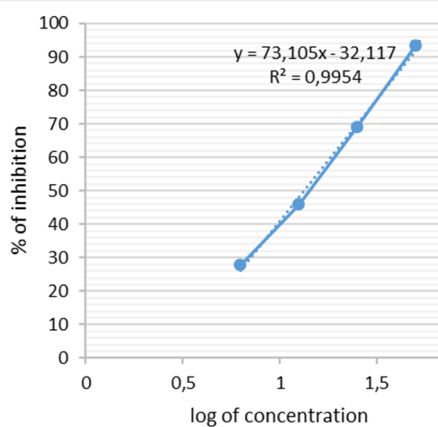

1.12327474

**3i**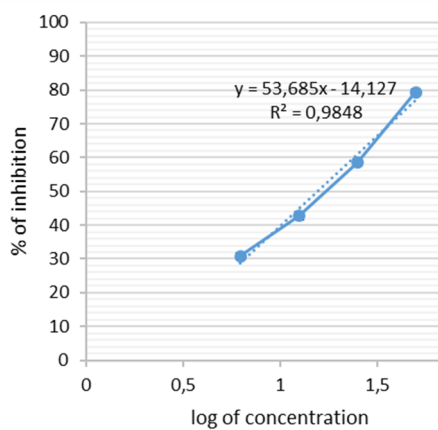

1.19450498

**3j**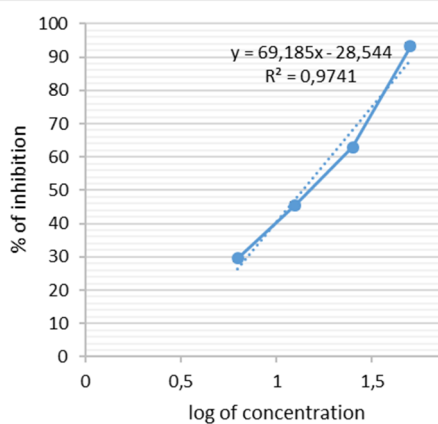

1.13527499

**3k**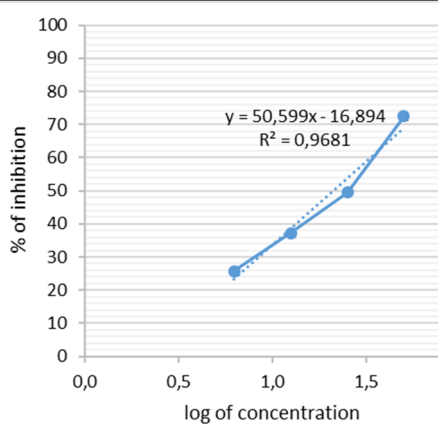

1.32204194

**3l**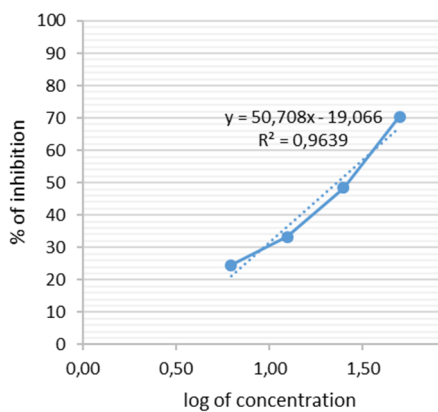

1.3620336

**3m**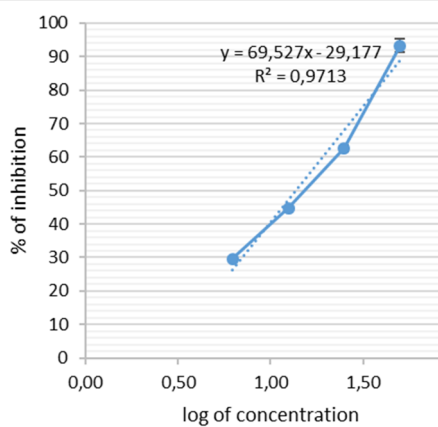

1.138795



**Acarbose** (Positive control)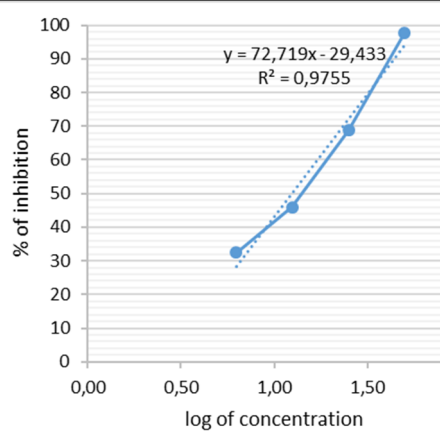

1.092328
